# Supplementary material
Source: Springer Nature journal article supplement (https://www.springermedizin.de/resource/supplementary/13054_2013_2186_MOESM1_ESM.pdf/9712630)

**A**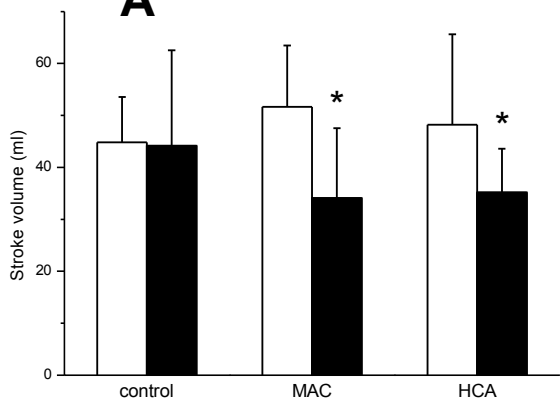**B**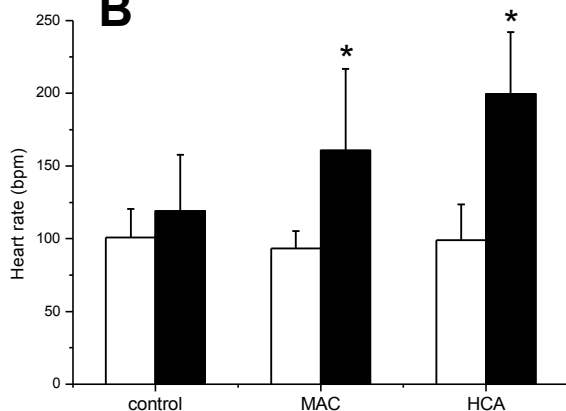**C**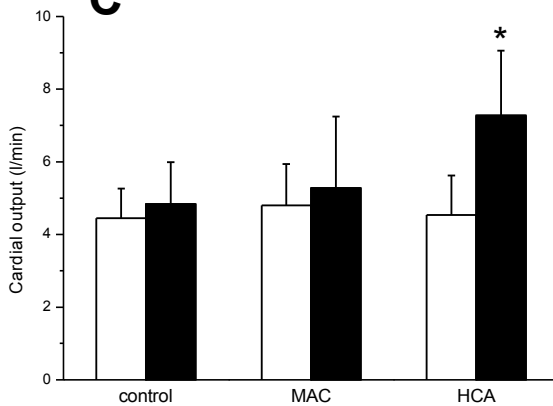**D**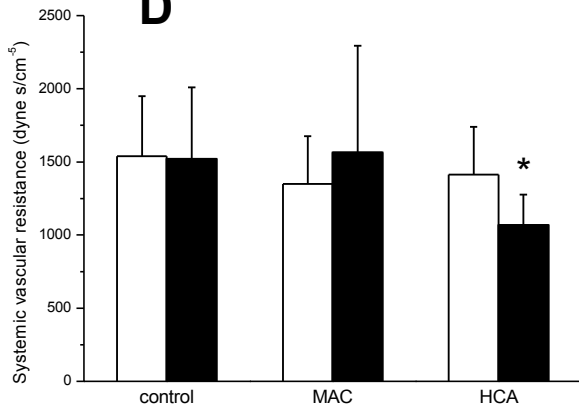**E**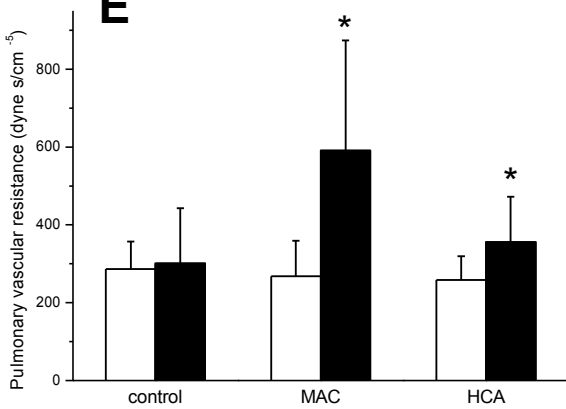

Supplement: MOESM1 [file 9712630]
